# Supplementary material for: Selection and Characterization of YKL-40-Targeting Monoclonal Antibodies from Human Synthetic Fab Phage Display Libraries
Source: MDPI journal article supplement (doi:10.3390/ijms21176354), 2020-09-01
Supplement: s1 [file s1]

**Table S1. Pharmacokinetic parameters of H1 (IgG).** The pharmacokinetic parameters were measured after intravenous injections (5 mg/kg administration) with H1 (IgG) in C57BL/6 mouse.

| Parameter                       | Value  |   |        |
|---------------------------------|--------|---|--------|
| $t_{1/2}$ (day)                 | 11.08  | ± | 0.33   |
| $T_{max}$ (hr)                  | 0.50   | ± | 0.00   |
| $C_{max}$ (μg/mL)               | 92.21  | ± | 22.22  |
| $C_{max}/dose$ (μg/mL/mg)       | 898.85 | ± | 221.58 |
| $C_0$ (μg/mL)                   | 112.40 | ± | 44.51  |
| $AUC_{last}$ (hr×mg/mL)         | 12.66  | ± | 0.42   |
| $AUC_{last}/dose$ (hr×mg/mL/mg) | 123.34 | ± | 5.27   |
| $AUC_{inf}$ (hr×mg/mL)          | 13.01  | ± | 0.45   |
| $AUC_{inf}/dose$ (hr×mg/mL/mg)  | 126.73 | ± | 5.55   |
| $AUC_{\%Extrap}$ (%)            | 2.67   | ± | 0.21   |
| $V_d$ (mL/kg)                   | 147.52 | ± | 5.10   |
| Cl (mL/hr/kg)                   | 0.38   | ± | 0.01   |

$t_{1/2}$ , terminal half-life;  $T_{max}$ , time at maximal concentration;  $C_{max}$ , maximal concentration;  $C_{max}/dose$ , dose-normalized  $C_{max}$ ;  $C_0$ , extrapolated zero time concentration;  $AUC_{last}$ , area under the curve from administration to the last measured concentration;  $AUC_{last}/dose$ , dose-normalized  $AUC_{last}$ ;  $AUC_{inf}$ , area under the curve from administration to infinity;  $AUC_{inf}/dose$ , dose-normalized  $AUC_{inf}$ ;  $AUC_{\%Extrap}$ , percentage of the extrapolated area under the curve at the total area under the curve;  $V_d$ , volume of distribution; Cl, clearance. Data presented as mean ± SD (total 6 mice, 3 mice/time point).
